# Supplementary material for: Defect control in Ca1−δCeδAg1−δSb (δ ≈ 0.15) through Nb doping
Source: Royal Society of Chemistry journal article supplement (doi:10.1039/c7qi00121e), 2017-01-01
Supplement: c7qi00121e1.pdf [file c7qi00121e1.pdf]

# Defect Control in $\text{Ca}_{1-\delta}\text{Ce}_\delta\text{Ag}_{1-\delta}\text{Sb}$ ( $\delta \approx 0.15$ ) Through Nb Doping

Xin Li,<sup>a</sup> Jun-Jie Yu,<sup>b</sup> Yin-Tu Liu,<sup>b</sup> Zhen Wu,<sup>a</sup> Jia Guo,<sup>a</sup> Tie-jun Zhu,<sup>b</sup> Xin-bing Zhao,<sup>b</sup> Xu-Tang  
Tao<sup>a</sup> and Sheng-Qing Xia<sup>\*a</sup>

<sup>a</sup>State Key Laboratory of Crystal Materials, Institute of Crystal Materials, Shandong University, Jinan, Shandong 250100, People's Republic of China.

<sup>b</sup>State Key Laboratory of Silicon Materials and School of Materials Science and Engineering, Zhejiang University, Hangzhou 310027, People's Republic of China.

## Supporting information

### Contents

- 1、 **Figure S1.** The electronic ( $\kappa_e$ ) and lattice ( $\kappa_l$ ) contributions of thermal conductivity for  $\text{Ca}_{0.725+x}\text{Nb}_{0.1-x}\text{Ce}_{0.15}\text{AgSb}$  ( $x \leq 0.05$ ) and  $\text{Ca}_{0.85}\text{Ce}_{0.15}\text{Ag}_{0.85}\text{Sb}$  compounds.
- 2、 **Figure S2.** Seebeck Pisarenko plot for  $\text{Ca}_{0.725+x}\text{Nb}_{0.1-x}\text{Ce}_{0.15}\text{AgSb}$  ( $x \leq 0.05$ ) and  $\text{Ca}_{0.85}\text{Ce}_{0.15}\text{Ag}_{0.85}\text{Sb}$  compounds. Experimental data are shown as scattered dots in different colors and the curves were calculated based on the SPB (Single Parabolic Band) model.

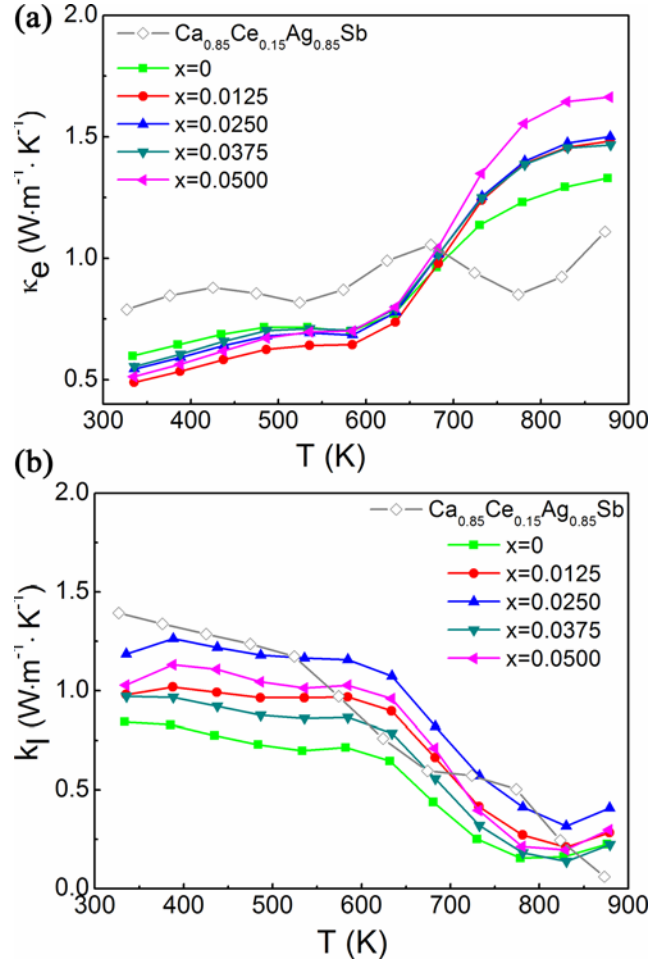

**Figure S1.** The electronic ( $\kappa_e$ ) and lattice ( $\kappa_l$ ) contributions of thermal conductivity for  $\text{Ca}_{0.725+x}\text{Nb}_{0.1-x}\text{Ce}_{0.15}\text{AgSb}$  ( $x \leq 0.05$ ) and  $\text{Ca}_{0.85}\text{Ce}_{0.15}\text{Ag}_{0.85}\text{Sb}$  compounds.

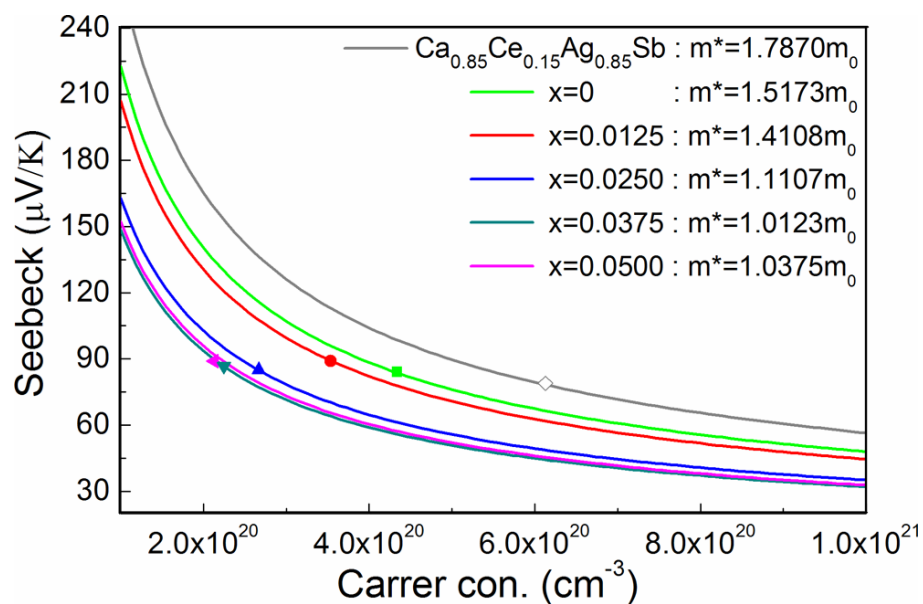

**Figure S2.** Seebeck Pisarenko plot for  $\text{Ca}_{0.725+x}\text{Nb}_{0.1-x}\text{Ce}_{0.15}\text{AgSb}$  ( $x \leq 0.05$ ) and  $\text{Ca}_{0.85}\text{Ce}_{0.15}\text{Ag}_{0.85}\text{Sb}$  compounds. Experimental data are shown as scattered dots in different colors and the curves were calculated based on the SPB (Single Parabolic Band) model.
